# Supplementary material for: An Automated System for Rapid Non-Destructive Enumeration of Growing Microbes
Source: PubMed Central journal article supplement (PMC2798718; doi:10.1371/journal.pone.0008609), 2010-01-07
Supplement: pone.0008609.s001.pdf [file pone.0008609.s001.pdf]

**Table S1. List of representative microbes that have been detected by the Growth Direct System****Bacteria**

|                                  |                                             |                                  |                                          |
|----------------------------------|---------------------------------------------|----------------------------------|------------------------------------------|
| <i>Acidovorax delafieldii</i>    | <i>Corynebacterium pseudodiphtheriticum</i> | <i>Micrococcus luteus</i>        | <i>Ralstonia isidiosa</i>                |
| <i>Acidovorax</i> sp.            | <i>Corynebacterium</i> sp.                  | <i>Moraxella osloensis</i>       | <i>Ralstonia pickettii</i>               |
| <i>Acidovorax temperans</i>      | <i>Corynebacterium xerosis</i>              | <i>Mycobacterium chelonae</i>    | <i>Rhodococcus erythropolis</i>          |
| <i>Acinetobacter junii</i>       | <i>Curtobacterium</i> sp.                   | <i>Mycoplasma arthritidis</i>    | <i>Roseomonas gilardii</i>               |
| <i>Acholeplasma laidlawii</i>    | <i>Deinococcus proteolyticus</i>            | <i>Mycoplasma bovis</i>          | <i>Roseomonas</i> sp.                    |
| <i>Afipia broomeae</i>           | <i>Dermacoccus nishinomiyaensis</i>         | <i>Mycoplasma fermentans</i>     | <i>Salmonella enterica</i>               |
| <i>Aquabacterium parvum</i>      | <i>Enterobacter aerogenes</i>               | <i>Mycoplasma hyorhinis</i>      | <i>Serratia marcesens</i>                |
| <i>Arthrobacter</i> sp.          | <i>Enterococcus faecalis</i>                | <i>Mycoplasma orale</i>          | <i>Sphingomonas paucimobilis</i>         |
| <i>Bacillus cereus</i>           | <i>Escherichia coli</i>                     | <i>Mycoplasma pneumoniae</i>     | <i>Sphingomonas parapaucimobilis</i>     |
| <i>Bacillus clausii</i>          | <i>Geobacillus stearothermophilus</i>       | <i>Mycoplasma synoviae</i>       | <i>Sphingomonas</i> spp.                 |
| <i>Bacillus fusiformis</i>       | <i>Gluconacetobacter liquifaciens</i>       | <i>Myxococcus xanthus</i>        | <i>Sphingomonas terrae</i>               |
| <i>Bacillus gibsonii</i>         | <i>Gluconacetobacter sacchari</i>           | <i>Neisseria</i> sp.             | <i>Staphylococcus aureus</i>             |
| <i>Bacillus licheniformis</i>    | <i>Gluconobacter cerinus</i>                | <i>Paenibacillus lautus</i>      | <i>Staphylococcus capitis</i>            |
| <i>Bacillus megaterium</i>       | <i>Halomonas magadiensis</i>                | <i>Paenibacillus</i> sp.         | <i>Staphylococcus epidermidis</i>        |
| <i>Bacillus pumilus</i>          | <i>Hydrogenophagea</i> sp.                  | <i>Pantoea agglomerans</i>       | <i>Staphylococcus equorum</i>            |
| <i>Bacillus</i> sp.              | <i>Hyphomicrobium</i> sp.                   | <i>Paracoccus</i> sp.            | <i>Staphylococcus haemolyticus</i>       |
| <i>Bacillus subtilis</i>         | <i>Kocuria kristinae</i>                    | <i>Pectinatus frisingensis</i>   | <i>Staphylococcus hominis</i>            |
| <i>Bacillus vortex</i>           | <i>Kocuria rhizophila</i>                   | <i>Pediococcus damnosus</i>      | <i>Staphylococcus saccharolyticus</i>    |
| <i>Bacteroides fragilis</i>      | <i>Kytococcus sedentarius</i>               | <i>Porphyromonas gingivalis</i>  | <i>Staphylococcus</i> sp.                |
| <i>Brachybacterium</i> sp.       | <i>Lactobacillus brevis</i>                 | <i>Prevotella melaninogenica</i> | <i>Staphylococcus warneri</i>            |
| <i>Bradyrhizobium</i> spp.       | <i>Lactobacillus delbrueckii</i>            | <i>Propionibacterium acnes</i>   | <i>Stenotrophomonas maltophilia</i>      |
| <i>Brevibacterium</i> sp.        | <i>Lactobacillus lindneri</i>               | <i>Proteus vulgaris</i>          | <i>Streptococcus</i> sp.                 |
| <i>Brevundimonas diminuta</i>    | <i>Macrococcus caseolyticus</i>             | <i>Pseudomonas aeruginosa</i>    | <i>Streptomyces chrysomallus</i> complex |
| <i>Burkholderia cepacia</i>      | <i>Methylobacterium extorquens</i>          | <i>Pseudomonas fluorescens</i>   | <i>Streptomyces coelicolor</i>           |
| <i>Caulobacter leidyii</i>       | <i>Methylobacterium radiotolerans</i>       | <i>Pseudomonas putida</i>        | <i>Streptomyces</i> sp.                  |
| <i>Chromobacterium violaceum</i> | <i>Microbacterium luteolum</i>              | <i>Pseudomonas stutzeri</i>      | <i>Vibrio natriegens</i>                 |
| <i>Clostridium sporogenes</i>    | <i>Microbacterium</i> sp.                   |                                  |                                          |

**Yeasts and molds**

|                                |                              |                                 |                                  |
|--------------------------------|------------------------------|---------------------------------|----------------------------------|
| <i>Alternaria alternata</i>    | <i>Candida albicans</i>      | <i>Exophiala</i> sp.            | <i>Schizophyllum commune</i>     |
| <i>Alternaria geophila</i>     | <i>Candida parapsilosis</i>  | <i>Fusarium solani</i>          | <i>Schizophyllum fasciatum</i>   |
| <i>Arthrinium sacchari</i>     | <i>Chaetomium globosum</i>   | <i>Penicillium camemberti</i>   | <i>Schizosaccharomyces pombe</i> |
| <i>Aspergillus flavus</i>      | <i>Chaetomium indicum</i>    | <i>Penicillium chrysogenum</i>  | <i>Sporidiobolus johnsonii</i>   |
| <i>Aspergillus fumigatus</i>   | <i>Cladosporium herbarum</i> | <i>Penicillium corylophylum</i> | <i>Sporotrichum pruinosum</i>    |
| <i>Aspergillus niger</i>       | <i>Dekkera anomala</i>       | <i>Penicillium notatum</i>      | <i>Torulaspora delbrueckii</i>   |
| <i>Aspergillus</i> sp.         | <i>Dekkera bruxellensis</i>  | <i>Penicillium roqueforti</i>   | <i>Trichoderma asperellum</i>    |
| <i>Aspergillus versicolor</i>  | <i>Epicoccum nigrum</i>      | <i>Rhizopus oligosporus</i>     | <i>Zygosaccharomyces rouxii</i>  |
| <i>Aureobasidium pullulans</i> | <i>Exophiala salmonis</i>    | <i>Saccharomyces cerevisiae</i> |                                  |

The Growth Direct System detects autofluorescent microcolonies from a broad range of strains as demonstrated by the breadth of the representative microbes listed in the table. All strains listed were identified by 16S ribosomal DNA sequencing or were purchased from a culture collection such as the ATCC. The Growth Direct System has also detected autofluorescent microcolonies corresponding to each of the many thousands of unidentified visible colonies isolated from environmental samples.
