# Supplementary material for: An Automated System for Rapid Non-Destructive Enumeration of Growing Microbes
Source: PubMed Central journal article supplement (PMC2798718; doi:10.1371/journal.pone.0008609), 2010-01-07
Supplement: pone.0008609.s002.pdf [file pone.0008609.s002.pdf]

**Table S2. Doubling times and lag phase of model organisms**

|                           | broth <sup>1</sup> | membranes | lag phase on membranes |
|---------------------------|--------------------|-----------|------------------------|
| <b><i>C. albicans</i></b> | 82 min             | 74 min    | 60 min                 |
| <b><i>E. coli</i></b>     | 21 min             | 20 min    | 40 min                 |
| <b><i>B. diminuta</i></b> | 64 min             | 55 min    | ND                     |

<sup>1</sup> log phase doubling times

Growth of cells in liquid media was monitored by titrating samples of the growing cultures (in triplicate) at specific time intervals (20 minutes for *E. coli* and 1 hour for *C. albicans* and *B. diminuta*). For cells on membranes, the doubling time was determined based on the increase in microcolony fluorescence intensity over time. At least 10 colonies were analyzed for each species. The lag phase on membranes was determined from the wash-off experiment described in the “Determining the number of cells in colonies” section of the Materials and Methods.
