# Supplementary material for: An Automated System for Rapid Non-Destructive Enumeration of Growing Microbes
Source: PubMed Central journal article supplement (PMC2798718; doi:10.1371/journal.pone.0008609), 2010-01-07
Supplement: pone.0008609.s006.pdf [file pone.0008609.s006.pdf]

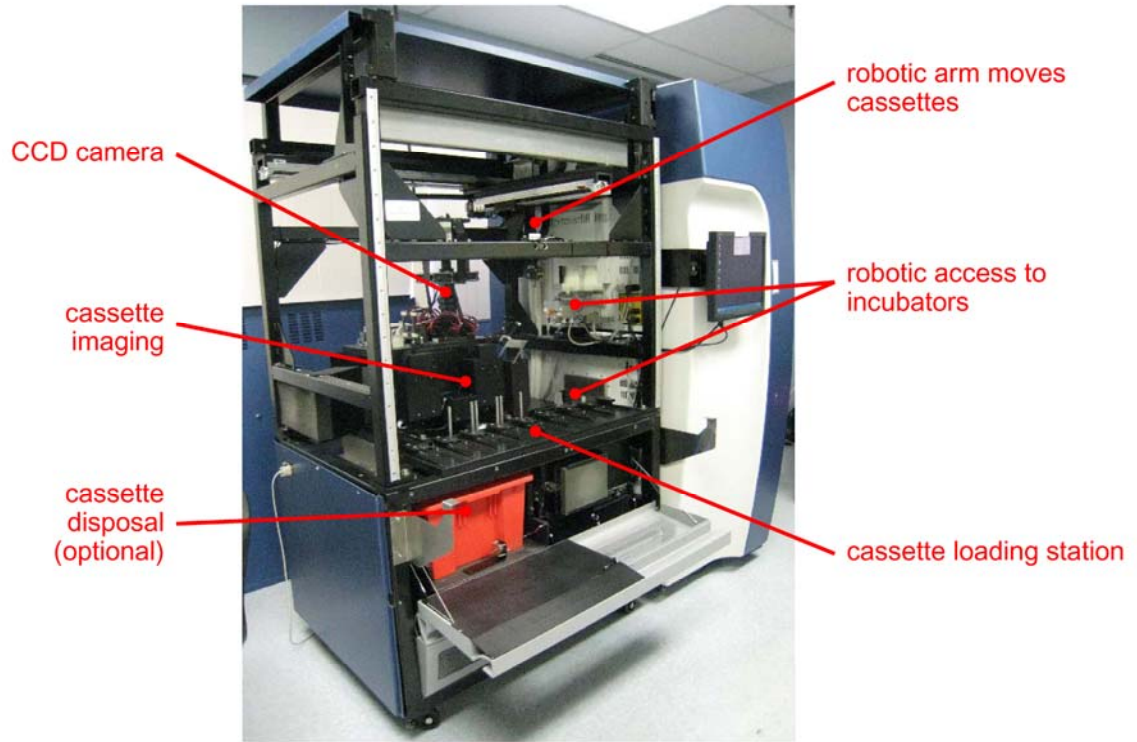

**Figure S3. Key components of the Growth Direct System.**
