# Supplementary material for: An Automated System for Rapid Non-Destructive Enumeration of Growing Microbes
Source: PubMed Central journal article supplement (PMC2798718; doi:10.1371/journal.pone.0008609), 2010-01-07
Supplement: pone.0008609.s008.pdf [file pone.0008609.s008.pdf]

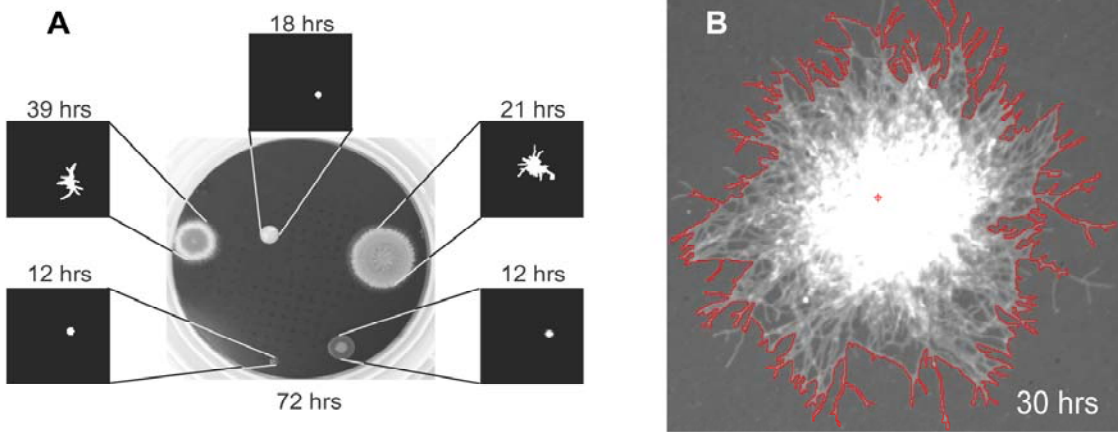

**Figure S5. The Growth Direct System software accurately detects colonies with diverse morphologies.** Panel A shows the rapid detection of microcolonies of varying morphologies from a pharmaceutical plant environmental air sample. A photograph of the visible colonies seen at 72 hr (center) is surrounded by images of the corresponding microcolonies detected much earlier by the Growth Direct System. Panel B shows a mold microcolony as detected by the Growth Direct System image analysis software (red outline).
