# Supplementary material for: An Automated System for Rapid Non-Destructive Enumeration of Growing Microbes
Source: PubMed Central journal article supplement (PMC2798718; doi:10.1371/journal.pone.0008609), 2010-01-07
Supplement: pone.0008609.s011.pdf [file pone.0008609.s011.pdf]

$$\text{model: } N_{\text{threshold}} = F_{\text{threshold}} \times F_{\text{cell}}^{-1}$$

$$\text{slope} = F_{\text{threshold}} = 81,000 \text{ fluorescein equivalents}$$

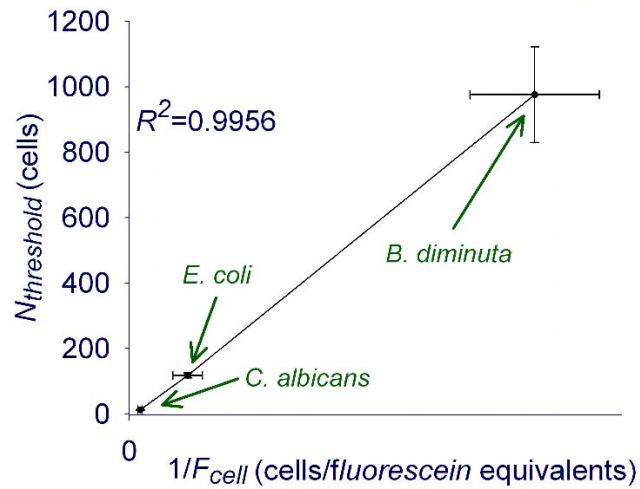

**Figure S8. The threshold number of cells required to first detect microcolonies is inversely proportional to the intrinsic cellular fluorescence.** The data plots the number of cells required to first detect autofluorescent microcolonies ( $N_{\text{thresh}}$ ) vs the intrinsic cellular fluorescence ( $F_{\text{cell}}$ ) for *E. coli*, *B. diminuta*, and *C. albicans*. The slope of the best-fit line estimates  $F_{\text{thresh}}$ , the threshold level of fluorescence required to detect microcolonies using the Growth Direct System (Equation 1 in text) is inversely proportional to their intrinsic cellular fluorescence.
