# Supplementary material for: An Automated System for Rapid Non-Destructive Enumeration of Growing Microbes
Source: PubMed Central journal article supplement (PMC2798718; doi:10.1371/journal.pone.0008609), 2010-01-07
Supplement: pone.0008609.s012.pdf [file pone.0008609.s012.pdf]

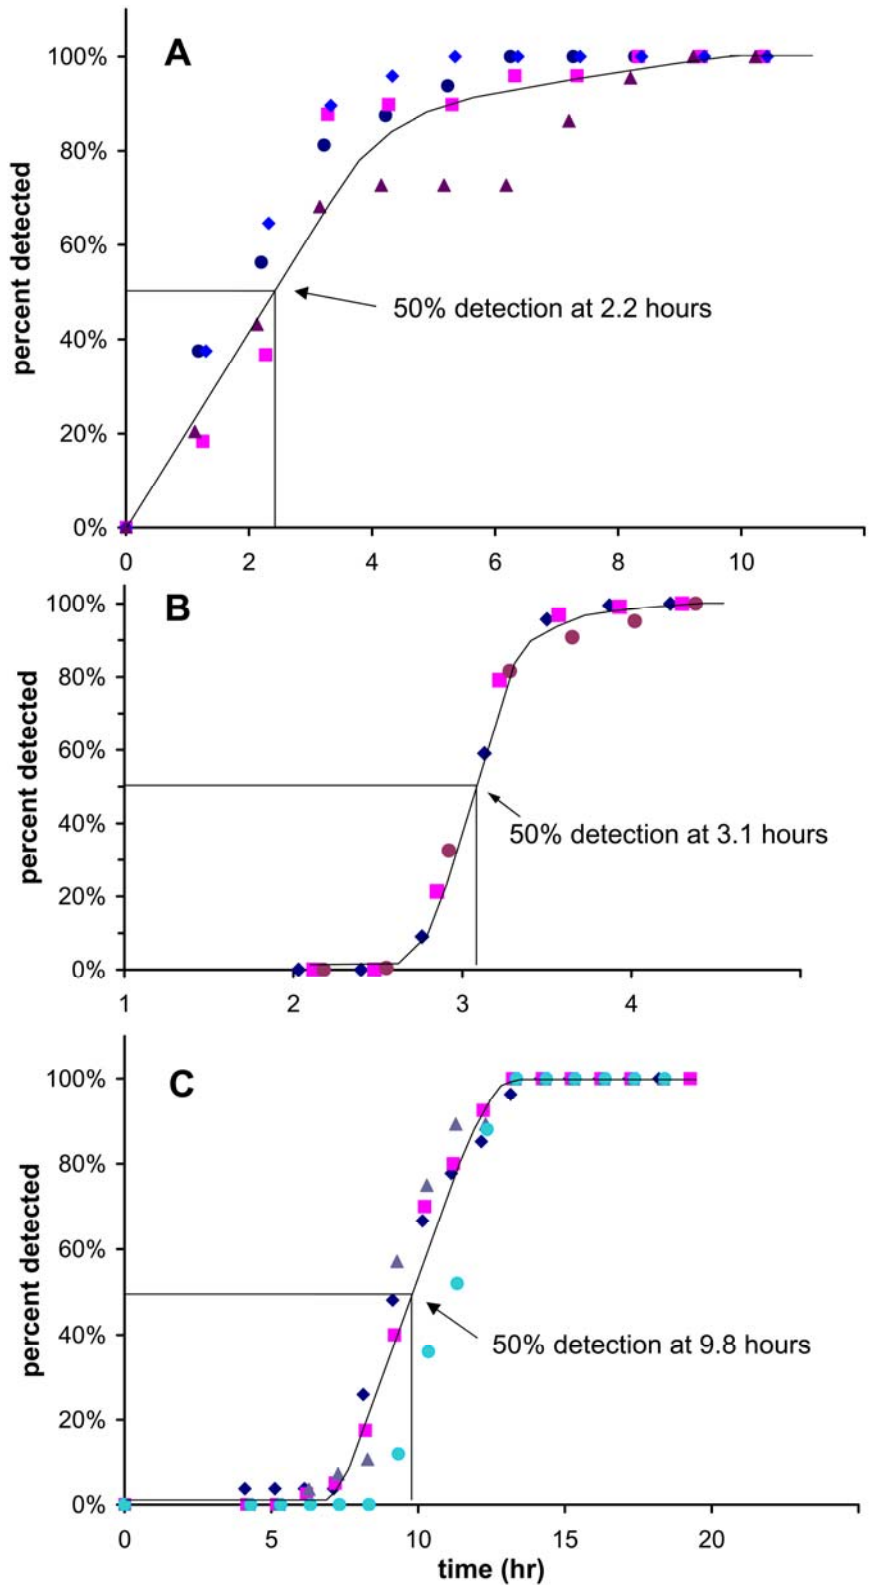

**Figure S9. Determining the time to detection for model organisms.** The plots show analysis of the time to detection for A) *C. albicans*, B) *E. coli*, and C) *B. diminuta*. Freshly grown cultures were filtered onto Growth Direct membranes, and then mounted onto growth cassettes. They were then imaged in the Growth Direct System over a number of closely spaced time intervals (see materials and methods for details). For each cassette, a different symbol was used to plot the percent of the total number of colonies vs. time. Using a Probit analysis on the combined data, the time to 50% detection was determined for each species.
